1 **Malaria and typhoid fever coinfection among patients presenting with febrile illnesses in Ga West**  
2 **Municipality, Ghana**

3  
4 Tanko Rufai<sup>1,2</sup>, Enoch Aninagyei<sup>3</sup>, Kwadwo Owusu Akuffo<sup>4</sup>, Christian Teye-Muno Ayin<sup>1</sup>,  
5 Priscillia Nortey<sup>1</sup>, Reginald Quansah<sup>1</sup>, Francis Samuel Cudjoe<sup>5</sup>, Ernest Tei-Maya<sup>6</sup>, Isaiah Osei  
6 Duah Junior<sup>4</sup>, Anthony Danso-Appiah<sup>1,\*</sup>

7  
8 <sup>1</sup> Department of Epidemiology and Disease Control, School of Public Health, University of  
9 Ghana, Legon, Accra, Ghana

10 <sup>2</sup> New Juaben South Municipal Health Directorate, Ghana Health Service, Koforidua, Ghana

11 <sup>3</sup> Department of Biomedical Sciences, School of Basic and Biomedical Sciences, University of  
12 Health and Allied Sciences, Ho, Ghana

13 <sup>4</sup> Department of Optometry and Visual Science, College of Science, Kwame Nkrumah  
14 University of Science and Technology, Kumasi, Ghana

15 <sup>5</sup> School of Biomedical and Allied Health Science, University of Ghana, Korle-Bu, Accra

16 <sup>6</sup> Department of Population, Family and Reproductive Health, School of Public Health,  
17 University of Ghana, Legon, Accra, Ghana Department of Population, Family and  
18 Reproductive Health

19 \* Correspondence: Anthony Danso-Appiah; [tdappiah01@gmail.com](mailto:tdappiah01@gmail.com); [adanso-  
appiah@ug.edu.gh](mailto:adanso-<br/>20 appiah@ug.edu.gh); [tdappiah@yahoo.co.uk](mailto:tdappiah@yahoo.co.uk)

21 **Abstract**

22 **Background:** Malaria and typhoid fever coinfection presents major public health problems  
23 especially in the tropics and sub-tropics where malaria and typhoid fever are co-endemic.  
24 Clinicians often treat both infections concurrently without laboratory confirmation. However,  
25 concurrent treatment has public health implications as irrational use of antibiotics or anti-  
26 malarials may lead to the emergence of drug resistance, unnecessary cost and exposure of  
27 patients to unnecessary side effects. This study determined the proportion of febrile conditions  
28 attributable to either malaria and/or typhoid fever and the susceptibility patterns of *Salmonella*  
29 spp. isolates to commonly used antimicrobial agents in Ghana.

30  
31 **Methods:** One hundred and fifty-seven (157) febrile patients attending the Ga West Municipal  
32 Hospital, Ghana, from February to May 2017 were sampled. Blood samples were collected for  
NOTE: This preprint reports new research that has not been certified by peer review and should not be used to guide clinical practice.

33 cultivation of pathogenic bacteria and the susceptibility of the *Salmonella* isolates to  
34 antimicrobial agents was performed using the Kirby-Bauer disk diffusion method with  
35 antibiotic discs on Müller Hinton agar plates. For each sample, conventional Widal tests for  
36 the detection of *Salmonella* spp were done as well as blood film preparation for detection of  
37 *Plasmodium* spp. Data on the socio-demographic and clinical characteristics of the study  
38 participants were collected using an android technology software kobo-collect by interview.  
39 Data were analyzed using Stata version 13 statistical Software. Logistic regression models were  
40 run to determine odds ratio (OR) and the direction of association between dependent and  
41 independent variables, setting p-value at <0.05 for statistical significance.

42

43 **Results:** Of the total number of patients aged 2–37 years (median age = 6 years, IQR 3–11),  
44 82 (52.2%) were females. The proportion of febrile patients with falciparum malaria were  
45 57/157 (36.3%), while *Salmonella typhi* O and H antigens were detected in 23/157 (14.6%) of  
46 the samples. The detection rate of *Salmonella* spp in febrile patients was 10/157 (6.4%).  
47 Malaria and typhoid fever coinfection using Widal test and blood culture was 9 (5.7%) and 3  
48 (1.9%), respectively. The isolates were highly susceptible to cefotaxime, ceftriaxone,  
49 ciprofloxacin, and amikacin but resistant to ampicillin, tetracycline, co-trimoxazole,  
50 gentamicin, cefuroxime, chloramphenicol, and meropenem.

51 **Conclusion:** *Plasmodium falciparum* and *Salmonella* spp coinfections were only up to 1.9%,  
52 while malaria and typhoid fever, individually, were responsible for 36.3% and 6.4%,  
53 respectively. Treatment of febrile conditions must be based on laboratory findings in order not  
54 to expose patients to unnecessary side effects of antibiotics and reduce the emergence and  
55 spread of drug resistance against antibiotics.

56

57 **Keywords:** Malaria; typhoid fever; co-morbidity; blood culture; antimicrobial pattern; Ga  
58 West municipality; Ghana

59

60

61

62

## 63 **Background**

64 Malaria and typhoid fever are two febrile illnesses that cause varying degrees of illness and  
65 death in the tropics and sub-tropics, where malaria and typhoid fever are co-endemic. In 2019,  
66 about 229 million cases of malaria were diagnosed, with 405,000 attributable deaths [1]. Two-  
67 thirds of these deaths occurred in children under five mostly from Africa[1, 2]. At the same  
68 time, typhoid fever, a systemic protracted febrile illness commonly caused by *Salmonella typhi*  
69 and common in malaria-endemic settings [3] resulted in 11 to 20 million cases and 20,000  
70 deaths [4]. Due to the lack of rapid, sensitive, and reliable differential diagnosis for *Salmonella*  
71 in these settings with mostly weak peripheral health systems and resource constraints, cases of  
72 acute febrile illnesses are usually treated presumptively as malaria by clinicians [5]. However,  
73 clinical diagnosis is problematic as most malaria-endemic areas are also co-endemic for other  
74 infectious diseases that cause fever, such as typhoid fever, urinary tract infection, and  
75 pneumonia [6]. Worryingly, diagnosis based on clinical presentation alone is neither sensitive  
76 nor specific, resulting in over-treatment in suspected patients [7] thereby developing drug  
77 resistance.

78  
79 The predisposition to malaria and typhoid fever coinfection is usually influenced by similar  
80 socio-epidemiological factors and dynamics such as dense populations with poor hygiene and  
81 sanitation practices [8, 9]. In Ghana, both malaria and typhoid fever were ranked among the  
82 twenty leading causes of outpatient morbidities in 2013 [10]. Febrile patients reporting to the  
83 Municipal Hospital are usually tested for malaria using the antigen-based point of care- rapid  
84 diagnostic test (POC-RDT) at the outpatient department. Similar to practices identified in other  
85 studies where malaria POC-RDT results were negative, still, patients were prescribed  
86 antimalarials with the potential consequences of over-medicalization [11].

87  
88 Malaria POC-RDT lacks sensitivity at low parasitemia levels below 50 parasite/ul of blood  
89 [12]. Only in severe clinical febrile illness are patients requested to do a Widal test. The Widal  
90 test also is not that sensitive, specific or reliable diagnostic assay for typhoid fever [13],  
91 although blood microscopy (for malaria) and blood, stool, or bone marrow culture (for typhoid  
92 fever) remain the definitive diagnostics commonly available in most weak health facilities.  
93 Performing separate tests with the definitive diagnostic methods for malaria and typhoid fever  
94 on an individual presenting with fever to ascertain true coinfection, to be followed by  
95 appropriate treatment, should remain the best option [13] if irrational use of antimalarials and

96 antibiotics, emergence of drug resistance, unnecessary cost and exposure of patients to  
97 unnecessary side effects is to be avoided. This study was conducted to provide epidemiological  
98 data on coinfection of malaria and typhoid fever using standard diagnostic methods and  
99 determine the susceptibility patterns of Salmonella isolates to commonly used antimicrobial  
100 agents in patients attending the municipal health facility.

101

## 102 **Methods**

### 103 **Study area and population**

104 The study was conducted at the Ga West Municipal Hospital (GWM) in Amasaman, Accra.  
105 The GWM is one of the 29 districts in the Greater Accra Region. The district is 60% rural and  
106 40% peri-urban and urban. The municipality was carved out of the erstwhile Ga District, which  
107 was created in 1988 in pursuance of the government's decentralization and local government  
108 reform policy [14]. In 2004, the Ga District was divided into two districts, Ga East and Ga  
109 West, then in 2008 the Ga West District was divided into two, creating Ga West and Ga South  
110 Municipalities. In 2018 it was further divided into Ga West and Ga North Municipalities, with  
111 Amasaman, remaining the capital of the Ga West Municipal. It lies between latitude 5048'  
112 North and 5039' North and longitude 0012' West and 0022' West. The Municipality shares  
113 borders with Ga East and Ga North Municipal Assembly to the south east, Nsawam Adoagyiri  
114 and Akwapem North to the north, and Ga Central and Ga South to the west. The location of  
115 this district is a major potential for investment and it is about 25 km west of Accra, the national  
116 capital. It occupies a land area of approximately 145.4 sq km with about 72 communities. The  
117 vast tract of land is being developed for both agriculture and estate development The population  
118 of the Municipality for 2020 was 127,841 [15]. The municipality is divided into four (4) sub-  
119 municipal areas for the purpose of planning and delivery of services, namely: Amasaman,  
120 Mayera, Oduman, and Kotoku. The municipality has a district hospital, four health centres,  
121 three clinics, four community-based health planning services (CHPS) zone compounds, nine  
122 urban CHPS, ten private hospitals and four maternity homes. The Ga West Municipal Hospital  
123 is the nearest referral hospital for the smaller health facilities in both Amasaman municipality  
124 and its environs, and in turn refer difficult cases to tertiary facilities in Accra.

125

### 126 **Sample preparation and collection**

127 The study sample comprised febrile patients aged 2 years and above. Samples were collected  
128 from February to May, 2017 at the outpatients' department (OPD) in Ga West Municipal

129 Hospital, Amasaman in the Greater Accra region of Ghana. Participation in the study was  
130 voluntary and those who refused to take part in the study were still given appropriate attention  
131 by the health personnel without any bias. Patients with fever  $> 37.5^{\circ}\text{C}$  presenting to the health  
132 facility at the OPD and having consent were included in the study. Patients who met the above  
133 criteria but were found to be on antibiotics or antimalarial therapy and those in critical  
134 conditions such as convulsion were excluded. Ten (10) milliliters of venous blood were  
135 collected aseptically from patients over the age of ten. Out of this volume of blood, 7 mL was  
136 inoculated immediately into 45 mL of brain heart infusion (BHI) broth and the remaining 3 mL  
137 was transferred into a sterile EDTA tube for malaria diagnosis and typhoid fever serodiagnosis.  
138 Similarly, 3-4 mL of blood was collected from children under 10 years old, and 1.5–2 mL of  
139 blood was inoculated into 9 mL of BHI broth to isolate *Salmonella typhi* and other *Salmonella*  
140 species.

141

## 142 **Laboratory procedures**

### 143 **Full blood count and malaria parasites detection**

144 The haemoglobin level and total white blood cell count for each patient were estimated using  
145 an automated haematology analyzer (Sysmex KX-21N, Germany), while the malaria POC-  
146 RDT was done with the SD Bioline rapid diagnostic test kit (Gyeonggi-do, Republic of Korea).  
147 Also, standard size thick and thin blood films were prepared, thoroughly air-dried and the thin  
148 films fixed with absolute methanol for malaria species identification. The blood films were  
149 stained with 10% (v/v) Giemsa solution for 20 minutes for the detection of *Plasmodium*  
150 parasites and speciation.

151

### 152 **The traditional Widal test**

153 The Widal agglutination test was performed on all blood samples using the rapid slide titration  
154 method to detect *Salmonella* antigens; somatic (O) and flagella (H) antigens (Medsorce Ozone  
155 Biomedicals, India). Briefly, 50  $\mu\text{L}$  of test serum was placed in two circles on a glass slide and  
156 equal volumes each of positive control and normal saline in each of the last two circles  
157 respectively. A drop each of O and H antigens were added to the test serum in each circle and  
158 then to the negative and positive controls. The content of each circle was mixed using the  
159 disposal mixing sticks provided and spread to the entire circle, after which it was rocked gently  
160 for 1 minute and observed for agglutination. Antibody titration was performed for the slide  
161 reactive samples using the tube technique. According to the manufacturer's instructions, an

162 antibody titer of > 1: 80 was considered to be significant and usually suggestive of infection,  
163 according to the manufacturer.

164

### 165 **Cultivation, isolation and identification of Salmonella spp from blood**

166 Blood in BHI broth was incubated aerobically at 35–37 °C for 7 days with intermittent  
167 cultivation on solid media plates, namely, MacConkey agar (MAC), blood agar (BA) and  
168 chocolate agar (CA) on day 2, day 4, and day 6. In the case where BHI broth showed no growth  
169 up to day 6, sub-cultures were repeated from the broth on day 7 before it was discarded. Also,  
170 on each day of sub-cultivation, broth tubes were examined for turbidity of blood-broth mixture,  
171 growth of micro-colonies, haemolysis, colour changes and gas production. For 24-48 hours,  
172 the BA and MAC agars were incubated aerobically at 35-37 °C and anaerobically at CA in  
173 micro-aerophilic conditions (5-10% CO<sub>2</sub>) for 24-48hrs. All isolates from the subcultures were  
174 Gram stained and identified through a series of biochemical tests.

175

### 176 **Biochemical characterization of bacteria**

177 Biochemical tests such as hydrogen sulphide production, presence of oxidase, indole  
178 production, carbohydrate metabolism (triple sugar iron agar), citrate utilization and urease  
179 production were used to identify pathogens in positive cultures. A sterilized vertical wire loop  
180 was used to pick about two colonies and inoculated into the various biochemical tests (triple  
181 sugar iron agar, citrate and urea slants). Gram negative rods that were oxidase negative with  
182 the characteristic red slope/yellow butt reaction on triple sugar iron agar either with or without  
183 production of H<sub>2</sub>S were confirmed as Salmonella species.

184

### 185 **Antimicrobial susceptibility testing (AST)**

186 The susceptibility of the Salmonella isolates to antimicrobial agents was performed using the  
187 Kirby-Bauer disk diffusion method with antibiotic discs on Müller Hinton agar plates (*Bauer*  
188 *et al.*, 1966). The antibiotics that were used include: Ampicillin (10ug), Co-trimoxazole (25ug),  
189 Tetracycline (10µg), Chloramphenicol (10ug), Ciprofloxacin (5ug), Amikacin (30ug),  
190 Gentamicin (10ug), Meropenem (10µg), Cefuroxime (30ug), Ceftriaxone (30µg) and  
191 Cefotaxime. About 2-3 colonies of the same morphological type were picked and emulsified  
192 in a test tube containing 2.5 mL of sterile peptone water to form a bacterial suspension  
193 (equivalent to the density of 0.5 MacFarland standard). A sterile swab stick was dipped into  
194 the suspension and uniformly spread on the surface of the Muller-Hinton agar by streaking the

195 entire agar surface [16]. Antibiotic discs obtained from Biomark Laboratory in India were  
196 firmly placed on the inoculated medium, inverted, and incubated for 24 hours at 35–  
197 37°C. Zones of inhibition were measured after the incubation period. The results were  
198 compared with the zone diameter interpretive standards of the Clinical Laboratory Standards  
199 Institute NCCLS, 2006 [16].

200

### 201 **Socio-demographic and clinical data collection**

202 After taking the body's temperature using an infrared thermometer, those whose temperature  
203 reading was  $\geq 37.5^\circ\text{C}$  and had consented were randomly selected. A questionnaire designed and  
204 deployed using an android technology, ordinary data kit (ODK) was administered to all  
205 participants in the study in English or the two main local languages (Twi or Ga) for those who  
206 could not speak English. Each subject was assigned an identification number. The  
207 questionnaire was made up of a section on the date of interview and individual serial number;  
208 a demographic section including age, sex, marital status, educational level, occupation, and  
209 location; and a clinical section covering fever, vomiting, diarrhoea, abdominal pain, joint pain,  
210 fatigue, headache, history of transfusion, and antibiotic use; and an environmental section on  
211 water source, toilet facility availability, bed net use, hand washing habits, and eating habits.  
212 Randomly selected participants were interviewed, with parents or guardians answering for  
213 children aged under 10 years. The questionnaire, which took an average of 15 minutes to  
214 administer, was applied by two trained nurses who can communicate in all the three languages.

215

### 216 **Ethical considerations**

217 The Ghana Health Service Ethics Review Committee approved this study (GHS-ERC  
218 52/12/16). Consent was obtained from each patient or guardian of patients aged less than 18  
219 years. Privacy and confidentiality of the study participants were ensured by conducting the  
220 interviews in a private and conducive environment.

221

### 222 **Data management and analysis**

223 Data were double-entered and cleaned in MS Excel before exporting to Stata 13.0 for analysis.  
224 Descriptive statistics were presented as percentages. Continuous variables were presented as  
225 mean with standard deviation (SD) and median with Interquartile range (IQR), while the Chi-  
226 squared test was used to determine the association of infection status and socio-demographic  
227 and clinical variables. Multivariate logistic regression analysis was performed to determine the

228 magnitude and direction of these factors, setting p-value at 0.05 for statistically significant  
229 associations.

## 230 **Results**

### 231 **Description of study participants**

232 The study involved 157 participants with febrile conditions (mean temperature  $38.7^{\circ}\text{C} \pm 0.7$ ).  
233 Participants were aged 2 to 37 years with median age of 6 years (IQR = 3 to 11 years). Majority  
234 of the study participants were females (n=82; 52.2%), students (n=114; 72.6%) and residents  
235 of Amasaman (n=82; 52.2%) (Table 1).

236



237 **Table 1** Proportion of patients with malaria and typhoid fever in relation to socio-  
 238 demographic characteristics

| Demographic characteristics | n (%)       | Malaria    |            | p-value | Typhoid fever |           | p-value |
|-----------------------------|-------------|------------|------------|---------|---------------|-----------|---------|
|                             |             | Negative   | Positive   |         | Negative      | Positive  |         |
| <b>Gender</b>               |             |            |            | 0.210   |               |           | 0.424   |
| Female                      | 82 (52.2%)  | 56 (68.3%) | 26 (31.7%) |         | 78 (95.1%)    | 4 (4.9%)  |         |
| Male                        | 75 (47.8%)  | 44 (58.7%) | 31 (41.3%) |         | 69 (92.0%)    | 6 (8.0%)  |         |
| <b>Age group</b>            |             |            |            | 0.975   |               |           | 0.643   |
| 1 – 5                       | 78 (49.7%)  | 50 (64.1%) | 28 (35.9%) |         | 73 (93.6%)    | 5 (6.4%)  |         |
| 6 – 10                      | 38 (24.2%)  | 24 (63.2%) | 14 (36.8%) |         | 35 (92.1%)    | 3 (7.9%)  |         |
| 11 – 15                     | 19 (12.1%)  | 11 (57.9%) | 8 (42.1%)  |         | 19 (100.0%)   | 0 (0.0%)  |         |
| 16 – 20                     | 6 (3.8%)    | 4 (66.7%)  | 2 (33.3%)  |         | 5 (83.3%)     | 1 (16.7%) |         |
| > 20                        | 16 (10.2%)  | 11 (68.8%) | 5 (31.2%)  |         | 15 (93.8%)    | 1 (6.2%)  |         |
| <b>Education</b>            |             |            |            | 0.925   |               |           | 0.794   |
| None                        | 28 (17.8%)  | 18 (64.3%) | 10 (35.7%) |         | 26 (92.9%)    | 2 (7.1%)  |         |
| Pre-school                  | 59 (37.6%)  | 41 (64.1%) | 23 (35.9%) |         | 59 (92.2%)    | 5 (7.8%)  |         |
| Primary                     | 37 (23.6%)  | 25 (64.1%) | 14 (35.9%) |         | 37 (94.9%)    | 2 (5.1%)  |         |
| Junior high                 | 16 (10.2%)  | 10 (62.5%) | 6 (37.5%)  |         | 16 (100%)     | 0 (0.0%)  |         |
| Senior high                 | 6 (3.8%)    | 5 (71.4%)  | 2 (28.6%)  |         | 6 (85.7%)     | 1 (14.3%) |         |
| Tertiary                    | 3 (1.9%)    | 1 (33.3%)  | 2 (66.7%)  |         | 3 (100.0%)    | 0 (0.0%)  |         |
| <b>Occupation</b>           |             |            |            | 0.989   |               |           | 0.918   |
| Civil servant               | 5 (3.2%)    | 3 (60.0%)  | 2 (40.0%)  |         | 5 (100.0%)    | 0 (0.0%)  |         |
| Merchant                    | 12 (7.6%)   | 8 (66.7%)  | 4 (33.3%)  |         | 11 (91.7%)    | 1 (8.3%)  |         |
| Unemployed                  | 26 (16.6%)  | 17 (65.4%) | 9 (34.6%)  |         | 24 (92.3%)    | 2 (7.7%)  |         |
| Student/pupil               | 114 (72.6%) | 72 (63.2%) | 42 (36.8%) |         | 107 (93.9%)   | 7 (6.1%)  |         |
| <b>Place of residence</b>   |             |            |            | 0.684   |               |           | 0.198   |
| Amasaman                    | 82 (52.2%)  | 52 (63.4%) | 30 (36.6%) |         | 80 (97.6%)    | 2 (2.4%)  |         |
| Pokuase                     | 6 (3.8%)    | 5 (55.6%)  | 4 (44.4%)  |         | 8 (88.9%)     | 1 (11.1%) |         |
| Ofankor                     | 23 (14.6%)  | 17 (73.9%) | 6 (26.1%)  |         | 21 (91.3%)    | 2 (8.7%)  |         |
| Other <sup>1</sup>          | 43 (27.4%)  | 26 (60.5%) | 17 (39.5%) |         | 38 (88.4%)    | 5 (11.6%) |         |

239 <sup>1</sup> Other parts of Accra

240

241 **Proportion of Malaria, Typhoid Fever and Malaria-Typhoid Fever Coinfection**

242 From the 157 febrile patients, 57 (36.3%) were malaria positive for RDT and confirmed by  
 243 microscopy. Twenty-three (14.6%) of patients had antibody titers for *Salmonella* spp while 10  
 244 (6.4%) were positive for blood culture. Diagnosing typhoid fever with Widal test and blood  
 245 culture, coinfection with malaria was 9 (5.7%) and 3 (1.9%), respectively (Table 2).

247 **Table 2** Prevalence of malaria and typhoid fever coinfection among febrile patients using  
248 widal test and blood culture

| Test          | Positive N (%) | Negative N (%) | Co-infection N (%) |
|---------------|----------------|----------------|--------------------|
| Malaria       | 57 (36.3)      | 100 (63.7)     | 0                  |
| Widal         | 23 (14.6)      | 134 (85.5)     | 9 (5.7)            |
| Blood culture | 10 (6.7)       | 147 (93.6)     | 3 (1.9)            |

249

### 250 **Factors Associated with Malaria and Typhoid Fever Infections**

251 Malaria and typhoid fever were usually associated with eating habits, poor toilet facilities,  
252 consumption of unhygienic water, poor handwashing habits, and non-usage of insecticide  
253 treated bed nets. A significant proportion (84.7%) of study participants infrequently ate outside  
254 their homes. Typhoid fever was not associated to eating habit (Table 3)

255 . Thirty (19.1%) of patients had no toilets while 56 (35.7%) had poor hand washing habits.  
256 Ninety-three (59.2%) used borehole or well as their source of water. A total of 103 (65.6%) of  
257 febrile patients does not use insecticide treated bed nets. No statistical association was found  
258 between users and non-users of insecticide treated bed nets with regards to malaria infection  
259 (Table 3).

260

261

262 **Table 3** Common determinants that are associated with malaria and typhoid fever in febrile  
 263 patients

| Characteristics                        | Malaria and Typhoid status |                | $\chi^2$ (p-value) | AOR [95%CI] (p-value)    |
|----------------------------------------|----------------------------|----------------|--------------------|--------------------------|
|                                        | Negative n (%)             | Positive n (%) |                    |                          |
| <b>Habit of eating outside home</b>    |                            |                |                    |                          |
| Never                                  | 10 (90.9)                  | 1 (9.1)        | 1.06               | *                        |
| Infrequently                           | 124 (93.2)                 | 9 (6.8)        | (0.59)             | 0.68 [0.07-6.57] (0.74)  |
| Frequently                             | 13 (100.0)                 | 0 (0.0)        |                    | 1                        |
| <b>Availability of toilet facility</b> |                            |                |                    |                          |
| Yes                                    | 120 (94.5)                 | 7 (5.5)        | 0.82               | *                        |
| No                                     | 27 (90.0)                  | 3 (10.0)       | (0.37)             | 1.85 [0.44-7.83] (0.40)  |
| <b>Source of drinking water</b>        |                            |                |                    |                          |
| Tap water                              | 49 (96.1)                  | 2 (3.9)        | 2.17 (0.70)        | *                        |
| Borehole                               | 85 (91.4)                  | 8 (8.0)        |                    | 2.40 [0.49-11.84] (0.28) |
| Packaged water                         | 4 (100.0)                  | 0 (0.0)        |                    | 1                        |
| River                                  | 5 (100.0)                  | 0 (0.0)        |                    | 1                        |
| Other <sup>1</sup>                     | 4 (100.0)                  | 0 (0.0)        |                    | 1                        |
| <b>Handwashing habit</b>               |                            |                |                    |                          |
| Good                                   | 95 (94.1)                  | 6 (5.9)        | 0.09               | *                        |
| Poor                                   | 52 (92.9)                  | 4 (7.1)        | (0.77)             | 1.13 [0.29-4.44] (0.86)  |
| <b>Bed net usage</b>                   |                            |                |                    |                          |
| Yes                                    | 35 (64.8)                  | 19 (35.2)      | 0.04               | *                        |
| No                                     | 65 (63.1)                  | 38 (36.9)      | (0.83)             | 1.08 [0.54-2.14] (0.83)  |

264 \* = Reference category; Significance at p-value  $\leq 0.05$

265 <sup>1</sup>Rain water

266

267

268 **Antimicrobial Susceptibility Profiles of Salmonellae Isolates**

269 All isolates exhibited resistance against ampicillin, tetracycline, co-trimoxazole, gentamicin,  
 270 cefuroxime, chloramphenicol and meropenem while the isolates showed susceptibility to  
 271 cefotaxime, ceftriaxone, ciprofloxacin and amikacin (Table 4).

272

273 **Table 4** Antimicrobial susceptibility profiles of the *Salmonellae* isolates for typhoid fever

| <b>Antibiotics</b> | <b><i>S. typhi</i><br/>N=10 (%)</b> | <b><i>S. paratyphi A</i><br/>N=3 (%)</b> | <b>Other <i>S. species</i><br/>N=2 (%)</b> | <b>Total<br/>N=15 (%)</b> |
|--------------------|-------------------------------------|------------------------------------------|--------------------------------------------|---------------------------|
| Ampicillin         | 8 (80) R                            | 3 (100) R                                | 2 (100) R                                  | 13 (86.7) R               |
| Tetracycline       | 9 (90) R                            | 3 (100) R                                | 2 (100) R                                  | 14 (93.3) R               |
| Co-trimoxazole     | 10 (100) R                          | 3 (100) R                                | 2 (100) R                                  | 15 (100) R                |
| Gentamicin         | 10 (100) R                          | 2 (66.7) R                               | 2 (100) R                                  | 14 (93.3) R               |
| Cefotaxime         | 7 (70) S                            | 2 (66.7) S                               | 1 (50) S                                   | 10 (66.7) S               |
| Cefuroxime         | 10 (100) R                          | 3 (100) R                                | 1 (50) R                                   | 14 (93.3) R               |
| Chloramphenicol    | 6 (60) R                            | 1 (33.3) R                               | 2 (100) R                                  | 9 (60) R                  |
| Ceftriaxone        | 8 (80) S                            | 2 (66.7) S                               | 1 (50) S                                   | 11 (73.3) S               |
| Ciprofloxacin      | 10 (100) S                          | 3 (100) S                                | 2 (100) S                                  | 15 (100) S                |
| Amikacin           | 10 (100) S                          | 3 (100) S                                | 2 (100) S                                  | 15 (100) S                |
| <b>Meropenem</b>   | 8 (80) R                            | 2 (66.7) R                               | 2 (100) R                                  | 12 (80) R                 |

274 R = resistant, S = sensitive

275

276 **Discussion**

277 Malaria and typhoid fever continue to be major diseases of public health concern, especially in  
 278 tropical countries, and are known to present clinically similar symptoms, with fever being the  
 279 major presentation [17]. Our investigation showed that the common clinical complaint reported  
 280 by patients with suspected malaria or typhoid fever was fever, followed by headache, then  
 281 abdominal pain. In the current study, 36.3% of patients with febrile illness were found to have  
 282 malaria and 14.6% and 6.4% had typhoid fever using the traditional Widal test and blood  
 283 culture respectively.

284

285 Despite the fact that the two diseases are endemic in Ghana, findings from this study show that  
 286 malaria was implicated as the cause of most febrile illnesses. Studies conducted elsewhere in  
 287 Ghana reported a marginally higher prevalence of malaria (18.6%) than typhoid fever (17%)

288 [18]. However, prevalence of malaria was found to be much higher than typhoid fever in this  
289 setting. Comparing widal test to blood culture assay (the gold standard diagnosis for typhoid  
290 fever), there was overestimation using the Widal test which gives a false positive of (8.3%) and  
291 this could be due to the persistence of Salmonella antibodies in the patients [19] or cross-  
292 reactivity of Salmonella H and O antigens with other pathogens [20].

293

294 Typhoid fever prevalence in this study, using the Widal test, is comparable to findings in  
295 Northwest Ethiopia (19.0%) [21] and Ibadan, (16.7%) [22] but much lower compared to other  
296 studies in Sierra Leone, (31.4%) [23], Kaduna State, (36.6%) [13] and Akoko (73.9%) [24].  
297 Differences in prevalence could be due to differences in Widal test kits used, seasonal  
298 variations during which the study was carried out, differences in cultural practices especially  
299 with respect to handwashing as well as availability of toilet facilities. Additionally, there is a  
300 variation in the baseline antibody titres of healthy individuals in different geographical settings,  
301 making the interpretations of the results complex [25]. Widal test is also known to cross-react  
302 with Plasmodium antibodies [26]. Due to these limitations, reason, diagnosis of typhoid fever  
303 using blood culture is preferred.

304

305 A previous study in Ghana [27], Cameroon [28], Nigeria [3, 29], Ethiopia [21] and India [13,  
306 30] used blood culture to diagnose typhoid fever in febrile patients. This study found that  
307 77/157 of the fevers were neither malaria nor typhoid. Clearly, other clinical conditions are  
308 also associated with fever. A few of them are sickle cell [31], viral infections [32], and other  
309 haemo-parasitic infections such as babesiosis [33]. It could also be a result of systemic  
310 inflammation [34]. Other bacterial infections such as leptospirosis [35], Mycoplasma  
311 pneumoniae infection [36], streptococcal throat infection [35] and meningitis [37] are also  
312 known to be associated with pyrexia. A study in Tanzania also found patients presenting with  
313 fever-related febrile conditions such as Q fever and brucellosis, were undetected in a large  
314 number of patient diagnoses, while malaria accounted for only 1.6% of all febrile illnesses  
315 [38]. These findings underscore the existence of non-malarial and non-typhoid febrile illnesses  
316 in both malaria and typhoid fever endemic regions which can only be detected with good  
317 diagnostic facilities. Therefore, the need for innovative biomedical technologies to aid  
318 diagnosis cannot be overemphasized.

319

320 It was found that insecticide-treated bed net usage was not associated with malaria even though  
321 about 65% of the patients did not use insecticide-treated bed nets. Insecticide-treated nets have  
322 been shown to be highly efficient at reducing malaria incidences [39]. Also, the source of  
323 drinking water was not associated with typhoid fever, though such an association has been  
324 previously found [40]. The frequency of typhoid fever was higher in study participants who  
325 bought food from a vendor. This observation could be due to unhygienic conditions that  
326 characterize commercial food preparation [41]. Eating habits, toilet facilities at home, and  
327 sources of water for drinking were also not significantly associated with typhoid fever. This  
328 finding is supported by a study in Ethiopia [21]. Surprisingly, the Salmonella pathogens  
329 isolated in this study were found to be resistant to seven out of the eleven (63.6%) antibiotics  
330 tested.

331  
332 The antibiotics found not to be effective against the pathogens were the penicillins (ampicillin),  
333 the sulphonamide (co-trimoxazole), tetracycline, the aminoglycoside (gentamicin),  
334 cephalosporin (cefuroxime), chloramphenicol (inhibitor of protein synthesis) and the  
335 carbapenem (meropenem). However, another penicillin class of antibiotics, amikacin, two  
336 cephalosporins that are  $\beta$ -lactam agents (cefotaxime and ceftriaxone) and the only  
337 fluoroquinolone (ciprofloxacin) were highly sensitive against the isolated pathogens. As  
338 reported in this study, several other studies in Ghana and elsewhere have reported high  
339 prevalences of ampicillin, co-trimoxazole, tetracycline, gentamicin, cefuroxime,  
340 chloramphenicol, and meropenem resistant blood pathogens [42, 43], [44], [45]. The resistance  
341 of blood pathogens to these antibiotics in this study could be associated with frequent use of  
342 these antibiotics in this setting. In this and other studies, amikacin has been found to be very  
343 effective against most bacteria, probably because of its resistance to most aminoglycoside-  
344 modifying enzymes. Amikacin has been widely used successfully to treat bacteria that were  
345 resistant to other aminoglycosides [46-48]. The cephalosporin class of antibiotics, especially  
346 the 3rd generation types, have shown tremendous success in treating Gram-negative infections  
347 such as salmonellosis. These cephalosporins are resistant to beta-lactamases produced by some  
348 bacteria [49, 50]. Multiple Plasmid –Mediated Quinolone Resistance (PMQR) resulting in  
349 resistance to ciprofloxacin in Salmonella species has increasingly been reported in some  
350 studies [51, 52]. However, this study together with several others, found ciprofloxacin to be  
351 sensitive to Salmonella species. [53-55]. Ciprofloxacin is known to exert its bactericidal action

352 by inhibiting DNA replication through inhibiting bacterial DNA topoisomerase and DNA-  
353 gyrase [56].

354

### 355 **Conclusion**

356 Despite the fact that these two infections are co-endemic in Ghana, the findings from this study  
357 show that malaria was the cause of fever among the febrile patients rather than typhoid fever.  
358 Due to the low prevalence of malaria and typhoid fever coinfection, clinicians should not treat  
359 concurrently but rather stick to differential diagnosis. The isolates exhibited high resistance  
360 against ampicillin, tetracycline, co-trimoxazole, gentamicin, cefuroxime, chloramphenicol and  
361 meropenem. Meanwhile, the isolates were sensitive to cefotaxime, ceftriazone, ciprofloxacin,  
362 and amikacin.

363

### 364 **Implications of these findings**

365 The implications of these findings are enormous. Based on these findings and reports from  
366 other studies, malaria was the cause of fever among febrile patients rather than typhoid fever.  
367 Meanwhile, the prevalence of malaria and typhoid fever coinfection was also found to be low.  
368 Therefore, treating bacterial infections without previous determination of antibiogram does not  
369 help the control of bacterial infections and also leads to the creation of drug-resistant strains. It  
370 is recommended that all bacterial and parasitic infections be treated by clinicians based on a  
371 laboratory diagnosis and antibiogram profile. This is because there is a chance that most  
372 commonly available antibiotics or antimalarials may not be sensitive to the pathogen causing  
373 the infection. Again, to reduce the risk of antimicrobial resistance development and the spread  
374 of resistant bacteria, healthcare organizations like Ghana Health Service must enact or re-  
375 enforce procedures to ensure the optimal use of antibiotics. This can be achieved by  
376 implementing antimicrobial stewardship programs. Organizations can provide appropriate  
377 antibiotics to patients requiring antibiotic treatment. Additionally, these programs ensure the  
378 correct antibiotic is prescribed at the right time, dose, and duration. Collectively, these  
379 measures improve patient health outcomes and preserve the effectiveness of antimicrobial  
380 treatments.

### 381 **Competing interests**

382 The authors declare that they have no competing interests.

383

384 **Availability of data and materials**

385 The data used to support the findings of this study have been deposited in the Harvard Data  
386 verserepository <https://dataverse.harvard.edu/dataset.xhtml?persistentId=doi:10.7910/DVN/C>  
387 KCOCA

388

389 **Funding Statement**

390 This work was funded from the authors' resources with no external financial support.

391 **Author's contributions**

392 TR, FSC and ADA conceptualized the study. TR and EA participated in the sample collection  
393 and laboratory analysis. TR, CTA drafted manuscript which was edited by KOA, PN, FSC,  
394 ETM, RQ, IODJ and was critically reviewed by ADA. This work as supervised by ADA. All  
395 authors have read and approved the manuscript.

396 **Acknowledgments**

397 We wish to thank the patients who participated in the study, and acknowledge the Ghana Health  
398 Services, Ga West Municipal Hospital and all the staff at outpatient and the laboratory  
399 department.

400



## 401 References

- 402 1. WHO: **World malaria report 2020: 20 years of global progress and challenges**. *World Health*  
403 *Organization* 2020.
- 404 2. Mbacham W, Ayong L, Guewo-Fokeng M, Makoge V: **Current situation of malaria in Africa**.  
405 In: *Malaria Control and Elimination*. edn.: Springer; 2019: 29-44.
- 406 3. Nwuzo A, Onyeagba R, Iroha I, Nworie O, Oji A: **Parasitological, bacteriological, and cultural**  
407 **determination of prevalence of malaria parasite (*Plasmodium falciparum*) and typhoid**  
408 **fever co-infection in Abakaliki, Ebonyi State**. *Scientific Research Essays* 2009, **4**(10):966-971.
- 409 4. Bonville C, Domachowske J: **Adenovirus**. In: *Vaccines*. edn.: Springer; 2021: 89-97.
- 410 5. Stoler J, Awandare GA: **Febrile illness diagnostics and the malaria-industrial complex: a**  
411 **socio-environmental perspective**. *BMC Infect Dis* 2016, **16**(1):683.
- 412 6. Chandramohan D, Jaffar S, Greenwood B: **Use of clinical algorithms for diagnosing malaria**  
413 **1**. *Tropical Medicine International Health* 2002, **7**(1):45-52.
- 414 7. Reyburn H, Ruanda J, Mwerinde O, Drakeley C: **The contribution of microscopy to targeting**  
415 **antimalarial treatment in a low transmission area of Tanzania**. *Malaria Journal* 2006,  
416 **5**(1):1-6.
- 417 8. Iheukwumere I, Nwachukwu CN, Kanu MA: **Manifestations, mismanagement and diagnostic**  
418 **challenges of malaria and typhoid fever**. *Malar Chemoth Cont Elimination* 2013, **2**(109):38-  
419 41.
- 420 9. Sharma B, Matlani M, Gaiind R, Pandey K: **Malaria and typhoid co-infection in India: a**  
421 **diagnostic Difficulty**. *Journal of Dental Medical Sciences* 2016, **15**(9):101-104.
- 422 10. GHS: **THE HEALTH SECTOR IN GHANA FACTS AND FIGURES 2015**. *GHANA HEALTH SERVICE*  
423 2015.
- 424 11. Manyando C, Njunju EM, Chileshe J, Siziya S, Shiff C: **Rapid diagnostic tests for malaria and**  
425 **health workers' adherence to test results at health facilities in Zambia**. *Malaria Journal*  
426 2014, **13**(1):1-8.
- 427 12. Aninagyei E: **Repeated sampling improved the sensitivity of malaria microscopy in children**  
428 **under six years**. *BMC Res Notes* 2020, **13**(1):508.
- 429 13. Mbuh FA, Galadima M, Ogbadu L: **Rate of co-infection with malaria parasites and**  
430 **Salmonella Typhi in Zaria, Kaduna State, Nigeria**. *Annals of African Medicine* 2003, **2**(2):64-  
431 67.
- 432 14. GWMA: **Ga West Municipal Asembly (2021)**. 2021.
- 433 15. GSS: **2010 Population and housing census**. *GSS (Ghana Statistical Service) (2010)* 2010.
- 434 16. Wikler MA: **Performance standards for antimicrobial susceptibility testing Sixteenth**  
435 **informational supplement**. *M 100-S 16* 2006.

- 436 17. Igharo EA, Osazuwa F, Ajayi SA, Ebueku A, Igbinigie O: **Dual infection with typhoid and**  
437 **malaria in febrile patients in Ikare Akoko, Nigeria.** *International Journal of Tropical*  
438 *Medicine* 2012, **7**(1):49-52.
- 439 18. Afoakwah R, Acheampong D, Boampong J, Sarpong-Baidoo M, Nwaefuna E, Tefe P: **Typhoid-**  
440 **Malaria co-infection in Ghana.** *Exp Biol* 2011, **1**(3):1-6.
- 441 19. House D, Wain J, Ho VA, Diep TS, Chinh NT, Bay PV, Vinh H, Duc M, Parry CM, Dougan G *et*  
442 *al*: **Serology of typhoid fever in an area of endemicity and its relevance to diagnosis.** *J Clin*  
443 *Microbiol* 2001, **39**(3):1002-1007.
- 444 20. Purwaningsih S, Handojo I, Prihatini, Probohoesodo Y: **Diagnostic value of dot-enzyme-**  
445 **immunoassay test to detect outer membrane protein antigen in sera of patients with**  
446 **typhoid fever.** *Southeast Asian J Trop Med Public Health* 2001, **32**(3):507-512.
- 447 21. Birhanie M, Tessema B, Ferede G, Endris M, Enawgaw B: **Malaria, typhoid fever, and their**  
448 **coinfection among febrile patients at a rural health center in Northwest Ethiopia: a cross-**  
449 **sectional study.** *Advances in medicine* 2014, **2014**.
- 450 22. Igbeneghu C, Olisekodiaka M, Onuegbu J: **Malaria and typhoid fever among adult patients**  
451 **presenting with fever in Ibadan, Southwest Nigeria.** *International journal of tropical*  
452 *medicine* 2009, **4**(3):112-115.
- 453 23. Sundufu A, James M, Foday I: **Role of co-infection with malaria parasites and Salmonella**  
454 **Typhoid in Bo City.** *Southern Sierra Leone Public Health Research* 2012, **2**(6):204-207.
- 455 24. !!! INVALID CITATION !!! {}.
- 456 25. Kumari CA, Rajasekhar K, Kirani KS, Murthy DS: **Study of Baseline Titres for Widal test**  
457 **among Population in Kakinada Region of AP.**
- 458 26. Pradhan P: **Coinfection of typhoid and malaria.** *Journal of medical laboratory diagnosis*  
459 2011, **2**(3):22-26.
- 460 27. Labi AK, Obeng-Nkrumah N, Addison NO, Donkor ES: **Salmonella blood stream infections in**  
461 **a tertiary care setting in Ghana.** *BMC Infect Dis* 2014, **14**:3857.
- 462 28. Ndip LM, Egbe FN, Kimbi HK, Njom HA, Ndip RN: **Co-infection of malaria and typhoid fever**  
463 **in feverish patients in the Kumba health district, Southwest Cameroon: public health**  
464 **implications.** *J IJTDH* 2015, **9**(4):1-11.
- 465 29. Orok DA, Usang AI, Ikpan OO, Duke EE, Eyo EE, Edadi UE, Ati BU, Udida JA: **Prevalence of**  
466 **malaria and typhoid fever co-infection among febrile patients attending college of health**  
467 **technology medical centre in Calabar, Cross River state, Nigeria.** 2016.
- 468 30. Samatha P, Rao CK, Sowmya SB: **Malaria typhoid co-infection among febrile patients.**  
469 *Journal of Evolution of Medical Dental Sciences* 2015, **4**(65):11322-11328.
- 470 31. Wierenga KJ, Hambleton IR, Wilson RM, Alexander H, Serjeant BE, Serjeant GR: **Significance**  
471 **of fever in Jamaican patients with homozygous sickle cell disease.** *Arch Dis Child* 2001,  
472 **84**(2):156-159.

- 473 32. Koskiniemi M-L, Vaheri A: **Acute encephalitis of viral origin.** *Scandinavian Journal of*  
474 *Infectious Diseases* 1982, **14**(3):181-187.
- 475 33. Hatcher JC, Greenberg PD, Antique J, Jimenez-Lucho VE: **Severe babesiosis in Long Island:**  
476 **review of 34 cases and their complications.** *Clinical infectious diseases* 2001, **32**(8):1117-  
477 1125.
- 478 34. Evans SS, Repasky EA, Fisher DT: **Fever and the thermal regulation of immunity: the**  
479 **immune system feels the heat.** *Nat Rev Immunol* 2015, **15**(6):335-349.
- 480 35. El-Radhi AS: **Fever in common infectious diseases.** In: *Clinical Manual of Fever in Children.*  
481 edn.: Springer; 2018: 85-140.
- 482 36. Mohammed H, Hassan M, Bakir S: **Campylobacter jejuni gastroenteritis in children in**  
483 **Basrah-Iraq.** *Mjbu* 2004, **22**(1&2):1-5.
- 484 37. Wong V, Hitchcock W, Mason W: **Meningococcal infections in children: a review of 100**  
485 **cases.** *The Pediatric infectious disease journal* 1989, **8**(4):224-227.
- 486 38. Crump JA, Morrissey AB, Nicholson WL, Massung RF, Stoddard RA, Galloway RL, Ooi EE,  
487 Maro VP, Saganda W, Kinabo GD: **Etiology of severe non-malaria febrile illness in Northern**  
488 **Tanzania: a prospective cohort study.** *PLoS neglected tropical diseases* 2013, **7**(7):e2324.
- 489 39. Klinkenberg E, Onwona-Agyeman KA, McCall PJ, Wilson MD, Bates I, Verhoeff FH, Barnish G,  
490 Donnelly MJ: **Cohort trial reveals community impact of insecticide-treated nets on**  
491 **malarionetric indices in urban Ghana.** *Trans R Soc Trop Med Hyg* 2010, **104**(7):496-503.
- 492 40. Achonduh-Atijegbe OA, Mfuh KO, Mbangé AH, Chedjou JP, Taylor DW, Nerurkar VR,  
493 Mbacham WF, Leke R: **Prevalence of malaria, typhoid, toxoplasmosis and rubella among**  
494 **febrile children in Cameroon.** *BMC infectious diseases* 2016, **16**(1):1-9.
- 495 41. Parry CM: **Epidemiological and clinical aspects of human typhoid fever.** *Salmonella*  
496 *infections: clinical, immunological molecular aspects* 2006:1-24.
- 497 42. Adzitey F: **Antibiotic resistance of Escherichia coli and Salmonella enterica isolated from**  
498 **cabbage and lettuce samples in Tamale metropolis of Ghana.** *International Journal of Food*  
499 *Contamination* 2018, **5**(1):1-7.
- 500 43. Kwaku GM, Samson SP, Charles M-RF: **Resistance of bacteria isolates from cabbage**  
501 **(Brassica oleracea), carrots (Daucus carota) and lettuce (Lactuca sativa) in the Kumasi**  
502 **Metropolis of Ghana.** *Int J Nutr Food Sci* 2016, **5**(4):297-303.
- 503 44. Firoozeh F, Shahcheraghi F, Salehi TZ, Karimi V, Aslani M: **Antimicrobial resistance profile**  
504 **and presence of class I integrons among Salmonella enterica serovars isolated from**  
505 **human clinical specimens in Tehran, Iran.** *Iranian journal of microbiology* 2011, **3**(3):112.
- 506 45. Ahmed AM, Younis EE, Ishida Y, Shimamoto T: **Genetic basis of multidrug resistance in**  
507 **Salmonella enterica serovars Enteritidis and Typhimurium isolated from diarrheic calves in**  
508 **Egypt.** *Acta tropica* 2009, **111**(2):144-149.

- 509 46. Gerding DN, Larson TA, Hughes RA, Weiler M, Shanholtzer C, Peterson LR: **Aminoglycoside**  
510 **resistance and aminoglycoside usage: ten years of experience in one hospital.** *Antimicrob*  
511 *Agents Chemother* 1991, **35(7)**:1284-1290.
- 512 47. Gad GF, Mohamed HA, Ashour HM: **Aminoglycoside resistance rates, phenotypes, and**  
513 **mechanisms of Gram-negative bacteria from infected patients in upper Egypt.** *PLoS One*  
514 2011, **6(2)**:e17224.
- 515 48. Marsot A, Guilhaumou R, Riff C, Blin O: **Amikacin in Critically Ill Patients: A Review of**  
516 **Population Pharmacokinetic Studies.** *Clin Pharmacokinet* 2017, **56(2)**:127-138.
- 517 49. Richards D, Heel R, Brogden R, Speight T, Avery G: **Ceftriaxone.** *Drugs* 1984, **27(6)**:469-527.
- 518 50. Jones RN, Thornsberry C: **Cefotaxime: a review of in vitro antimicrobial properties and**  
519 **spectrum of activity.** *Rev Infect Dis* 1982, **4 Suppl**:S300-315.
- 520 51. Cui S, Li J, Sun Z, Hu C, Jin S, Guo Y, Ran L, Ma Y: **Ciprofloxacin-resistant Salmonella enterica**  
521 **serotype Typhimurium, China.** *Emerg Infect Dis* 2008, **14(3)**:493-495.
- 522 52. Threlfall EJ, Ward LR: **Decreased susceptibility to ciprofloxacin in Salmonella enterica**  
523 **serotype typhi, United Kingdom.** *Emerg Infect Dis* 2001, **7(3)**:448-450.
- 524 53. Khanal B, Sharma SK, Bhattacharya SK, Bhattarai NR, Deb M, Kanungo R: **Antimicrobial**  
525 **susceptibility patterns of Salmonella enterica serotype typhi in eastern Nepal.** *J Health*  
526 *Popul Nutr* 2007, **25(1)**:82-87.
- 527 54. Davis R, Markham A, Balfour JA: **Ciprofloxacin. An updated review of its pharmacology,**  
528 **therapeutic efficacy and tolerability.** *Drugs* 1996, **51(6)**:1019-1074.
- 529 55. DM C-R, Monk J, Price A, Benfield P, Todd P, WARD A: **Ciprofloxacin. A review of its**  
530 **antibacterial activity, pharmacokinetic properties and therapeutic use.** *Drugs* 1988,  
531 **35(4)**:373-447.
- 532 56. Fisher LM, Lawrence JM, Josty IC, Hopewell R, Margerrison EE, Cullen ME: **Ciprofloxacin and**  
533 **the fluoroquinolones: new concepts on the mechanism of action and resistance.** *The*  
534 *American journal of medicine* 1989, **87(5)**:S2-S8.

535
